# Supplementary material
Source: PubMed Central journal article supplement (PMC7269992)
Supplement: ajtr0012-1873-f7.pdf [file ajtr0012-1873-f7.pdf]

# lncRNAs predict OS in HCC

**Table S1.** Different K values and values of probably approximately correct (PAC)

| K  | Value of PAC |
|----|--------------|
| 2  | 0.042750     |
| 3  | 0.460665     |
| 4  | 0.408903     |
| 5  | 0.286367     |
| 6  | 0.258136     |
| 7  | 0.216269     |
| 8  | 0.208763     |
| 9  | 0.194634     |
| 10 | 0.187596     |

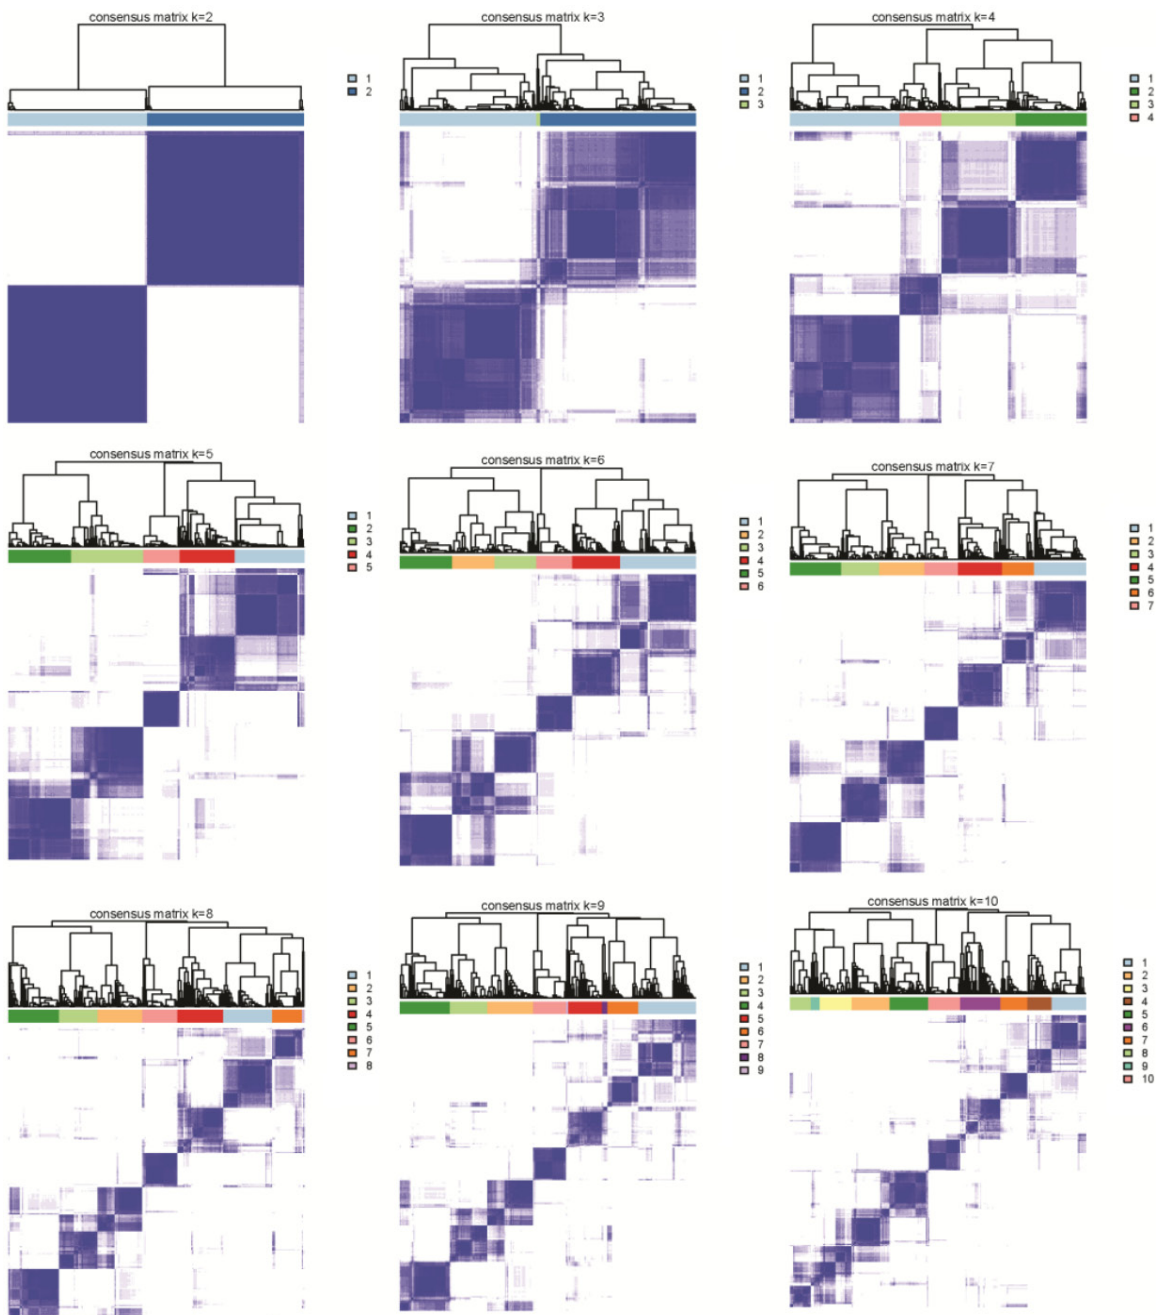

## lncRNAs predict OS in HCC

**Figure S1.** Consensus matrix for clustering.

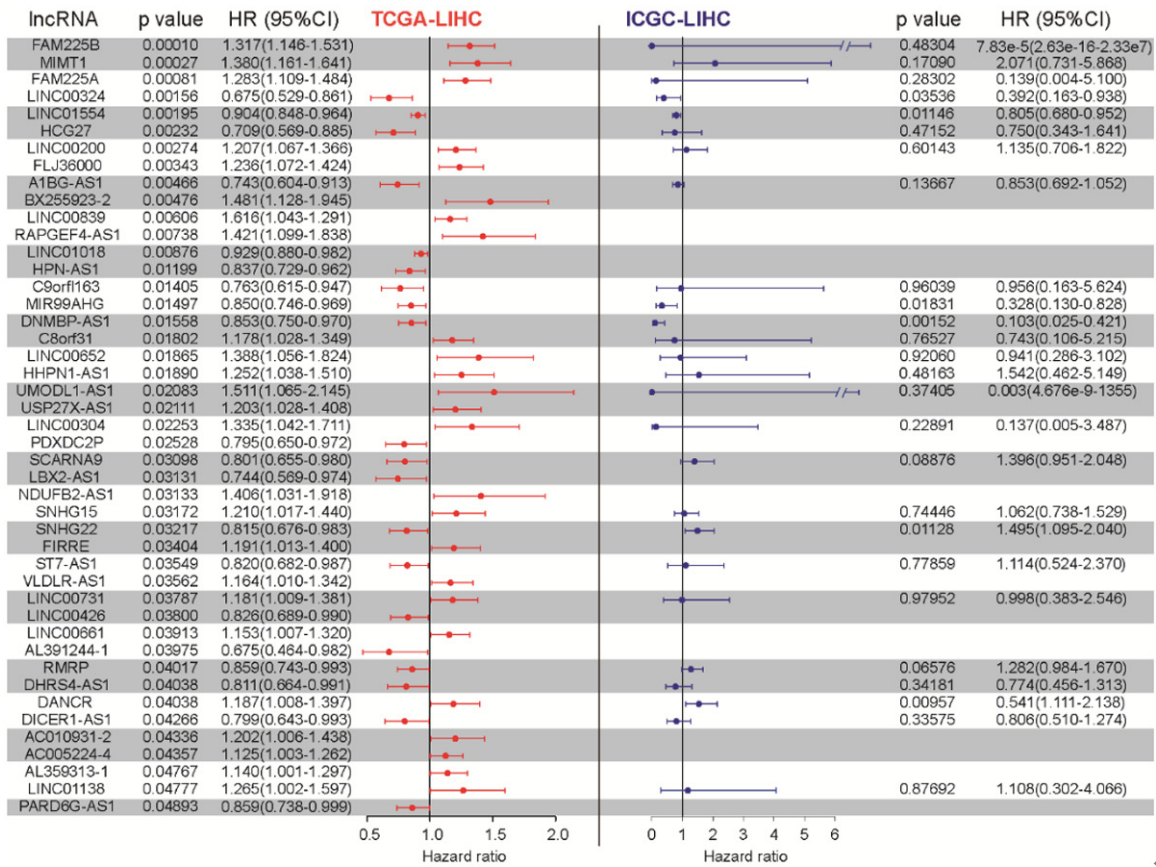

**Figure S2.** Survival analysis of individual lncRNA (adjusting for established risk factors) in the TCGA-LIHC (left and red) and ICGC-LIHC cohort (right and blue).
